# Supplementary material for: The natural tannins oligomeric proanthocyanidins and punicalagin are potent inhibitors of infection by SARS-CoV-2
Source: eLife. 2023 Aug 29;12:e84899. doi: 10.7554/eLife.84899 (PMC10465125; doi:10.7554/eLife.84899)
Supplement: Figure 1—source data 1. [file elife-84899-fig1-data1.xlsx]

## Sheet: 工作表1
			Tannic acid	OPC	Punicalagin
		IC50 (mg/ml)	6.99±0.84***	10.68±1.03***	34.61±1.539
