# Supplementary material for: The natural tannins oligomeric proanthocyanidins and punicalagin are potent inhibitors of infection by SARS-CoV-2
Source: eLife. 2023 Aug 29;12:e84899. doi: 10.7554/eLife.84899 (PMC10465125; doi:10.7554/eLife.84899)
Supplement: Figure 2—source data 1. [file elife-84899-fig2-data1.xlsx]

## Sheet: 工作表1
				Tannic acid	OPC	Punicalagin
		CC50a	293T-ACE2	143.9±11.58	215.8±5.514***	605.9±61.13***
			NCI-H460	71.57±4.98	92.48±6.67***	88.43±6.76**
		EC50b	293T-ACE2	3.16±0.278	3.86±0.35*	3.70±2.24
			NCI-H460	3.02±0.34	4.09±0.33**	4.65±0.47**
		SIc	293T-ACE2	45.54	55.91	163.76
			NCI-H460	23.7	22.61	19.02
