# Supplementary material for: The natural tannins oligomeric proanthocyanidins and punicalagin are potent inhibitors of infection by SARS-CoV-2
Source: eLife. 2023 Aug 29;12:e84899. doi: 10.7554/eLife.84899 (PMC10465125; doi:10.7554/eLife.84899)
Supplement: Figure 3—source data 1. [file elife-84899-fig3-data1.xlsx]

## Sheet: 工作表1
					Tannic acid	OPC	Punicalagin
		CC50a	VeroE6		128.70±11.22	166.00±15.75	84.72±5.55***
		EC50b	VeroE6	Cont.	6.91±0.63	4.14±0.45	5.47±1.27
				TMPRSS2	2.511±0.3164***	2.161±0.1956*	5.802±1.736
		SIc	VeroE6	Cont.	18.63	40.06	15.49
				TMPRSS2	51.25	76.82	14.6
