# Supplementary material for: The natural tannins oligomeric proanthocyanidins and punicalagin are potent inhibitors of infection by SARS-CoV-2
Source: eLife. 2023 Aug 29;12:e84899. doi: 10.7554/eLife.84899 (PMC10465125; doi:10.7554/eLife.84899)
Supplement: Figure 6—source data 1. [file elife-84899-fig6-data1.xlsx]

## Sheet: 工作表1
		mg/g	OPCs	Tannic acid	Punicalagin
		Seed	13.5	1.2	0
		Peel	0.4	0	0
		Flesh	0	0	0
		Grape juice w/ seed	0.77	n.d	n.d.
		Grape juice w/o seed	0.03	n.d.	n.d.
